# Supplementary material for: Stochastic economic evaluation of different production pathways for renewable propylene glycol production via catalytic hydrogenolysis of glycerol
Source: Royal Society of Chemistry journal article supplement (doi:10.1039/d2re00281g), 2022-10-13
Supplement: d2re00281g1.pdf [file d2re00281g1.pdf]

Table S1: Breakdown of the CAPEX

| <b>CAPEX Component</b>                                     | <b>Calculation factor</b>     | <b>Scenario 1 (M.U.\$)</b> | <b>Scenario 2 (M.U.\$)</b> | <b>Scenario 3 (M.U.\$)</b> |
|------------------------------------------------------------|-------------------------------|----------------------------|----------------------------|----------------------------|
| <b>Equipment purchase cost, EPC (Bare module cost) (1)</b> | 1EPC                          | 7.0                        | 13.8                       | 13.6                       |
| <b>Equipment installation cost (2)</b>                     | 0.4EPC                        | 2.8                        | 5.5                        | 5.5                        |
| <b>Controls and instrumentation (3)</b>                    | 0.26EPC                       | 1.8                        | 3.6                        | 3.5                        |
| <b>Piping and Electrical systems (4)</b>                   | 0.41EPC                       | 2.9                        | 5.7                        | 5.6                        |
| <b>Buildings (including services) (5)</b>                  | 0.1EPC                        | 0.7                        | 1.4                        | 1.4                        |
| <b>Yard improvements (6)</b>                               | 0.12EPC                       | 0.8                        | 1.7                        | 1.6                        |
| <b>Direct cost, DC (7)</b>                                 | (7) = (1)<br>+(2)<br>....+(6) | 16.0                       | 31.6                       | 31.2                       |
| <b>Indirect cost, INC (8)</b>                              | (8) =<br>0.29DC               | 4.6                        | 9.2                        | 9.1                        |
| <b>Fixed capital investment, FCI (9)</b>                   | (9) = DC +<br>INC             | 20.6                       | 40.8                       | 40.3                       |
| <b>Working capital, WC (10)</b>                            | 0.15FCI                       | 3.1                        | 6.1                        | 6.0                        |
| <b>Startup cost (SUC) (11)</b>                             | 0.05FCI                       | 1.0                        | 2.0                        | 2.0                        |
| <b>CAPEX</b>                                               | FCI + WC +<br>SUC             | 24.7                       | 49.0                       | 48.3                       |

Table S2: Breakdown of the OPEX

| Parameter                                                                      | Factors used for estimation                      | Scenario 1 (M.U.\$) | Scenario 2 (M.U.\$) | Scenario 3 (M.U.\$) |
|--------------------------------------------------------------------------------|--------------------------------------------------|---------------------|---------------------|---------------------|
| Supervision (1)                                                                | 0.25Lcost                                        | 0.1                 | 0.1                 | 0.2                 |
| Direct overhead (2)                                                            | 0.5 (Lcost + supervision cost)                   | 0.2                 | 0.4                 | 0.4                 |
| General overhead (3)                                                           | 0.5 (Lcost + supervision cost + direct overhead) | 0.3                 | 0.5                 | 0.6                 |
| Insurance and tax (4)                                                          | 0.01FCI                                          | 0.2                 | 0.4                 | 0.4                 |
| Maintenance labor and materials (5)                                            | 0.03FCI                                          | 0.7                 | 1.5                 | 1.4                 |
| Additional expenses (e.g., marketing, logistics, operation services, etc.) (6) | 0.01FCI                                          | 0.2                 | 0.4                 | 0.4                 |
| Laboratory cost (7)                                                            | 0.01Lcost                                        | 0.0                 | 0.0                 | 0.0                 |
| Financing working capital (8)                                                  | 0.1 WC                                           | 0.3                 | 0.6                 | 0.6                 |
| <b>Fixed operating cost (9)</b>                                                | <b>(9) = Sum (1-8)</b>                           | <b>2.1</b>          | <b>3.9</b>          | <b>4.1</b>          |
| <b>Utilities</b>                                                               |                                                  |                     |                     |                     |
| Cooling water (10)                                                             | U.S. \$ 0.46/ m <sup>3</sup>                     | 0.1                 | 0.1                 | 0.9                 |
| Electricity (11)                                                               | 0.31 U.S. \$/KWh per unit                        | 0.5                 | 2.8                 | 13.5                |
| Steam (12)                                                                     | 0.52 U.S. \$/KJ                                  | 0.9                 | 0.9                 | 1.5                 |
| Ash disposal from HTG (13)                                                     | 22.8 U.S.\$/ton                                  | 0.0                 | 2.7                 | 0.0                 |
| <b>Total utilities cost (U.S. \$) (14)</b>                                     | <b>(14) = Sum (10 - 13)</b>                      | <b>1.5</b>          | <b>6.6</b>          | <b>15.9</b>         |
| <b>Feedstock</b>                                                               |                                                  |                     |                     |                     |
| Deionized water (15)                                                           | U.S. \$81.8/1000 m <sup>3</sup>                  | 0.0                 | 3.3                 | 0.0                 |
| Crude glycerol, 48,314 tons/y (16)                                             | 0.1 U.S. \$/tons                                 | 0.0                 | 0.0                 | 0.0                 |
| Hydrogen cost for scenario 1 (17)                                              | U.S. \$0.7955/kg                                 | 0.4                 | 0.0                 | 0.0                 |
| Catalyst cost (18)                                                             | U.S. \$30.78/kg                                  | 1.2                 | 1.2                 | 1.2                 |
| <b>Total feed cost (19)</b>                                                    | <b>(19) = Sum (15-18)</b>                        | <b>1.6</b>          | <b>4.5</b>          | <b>1.2</b>          |
| <b>Variable operating costs (20)</b>                                           | <b>(20) = (14) +(19)</b>                         | <b>3.1</b>          | <b>11.1</b>         | <b>17.1</b>         |

|                  |                         |            |             |             |
|------------------|-------------------------|------------|-------------|-------------|
| <b>OPEX (21)</b> | <b>(21) = (9) +(20)</b> | <b>5.2</b> | <b>15.0</b> | <b>21.2</b> |
|------------------|-------------------------|------------|-------------|-------------|

Table S3: Summary of the overall EPC

|                          | Scenario 1<br>(M.U.S\$) | Scenario 2<br>(M.U.S.\$) | Scenario 3<br>(M.U.S.\$) |
|--------------------------|-------------------------|--------------------------|--------------------------|
| Distillation column      | 2.4806                  | 2.4759                   | 1.7507                   |
| Heat exchangers          | 0.3229                  | 0.5156                   | 0.1687                   |
| Pumps                    | 2.0428                  | 2.1826                   | 1.543                    |
| Compressors              | 1.3815                  | 1.3815                   | 1.6774                   |
| Flash separator          | 0.13                    | 0.13                     | 0.506                    |
| CTH reactor              | 0.3239                  | 0.3239                   | 0.2427                   |
| RPG purification unit    | 0.2829                  | 0.2835                   | 0.2486                   |
| Mixers                   | 0.01                    | 0.01                     | 0.02                     |
| Hydrogen separation unit | 0                       | 0.2787                   | 0                        |
| Combustion chamber       | 0                       | 0.89                     | 0.89                     |
| HTG reactor              | 0                       | 5.34                     | 0                        |
| Electrolytic unit        | 0                       | 0                        | 6.5819                   |
| <b>Total</b>             | <b>6.9746</b>           | <b>13.8117</b>           | <b>13.629</b>            |
